# Supplementary material for: Intestinal and Hepatic Uptake of Dietary Peroxidized Lipids and Their Decomposition Products, and Their Subsequent Effects on Apolipoprotein A1 and Paraoxonase1
Source: MDPI journal article supplement (doi:10.3390/antiox10081258), 2021-08-06
Supplement: s1 [file s1]

**Supplementary Tables and Figures:****Table S1.** RT-PCR Primer Sequences

| Primer | Sequence (5' to 3')                                                 |
|--------|---------------------------------------------------------------------|
| ApoA1  | Forward: TGGGATCGAGTGAAGGACCT<br>Reverse: CTCCTCCTGCCACTTCTTCTG     |
| PON1   | Forward: CTCACTGAGGCGGTCATGTT<br>Reverse: TAGGCTTTGCTGTCCTGAGC      |
| GAPDH  | Forward: AGTCAACGGATTTGGTCGTA<br>Reverse: GGAACATGTAAACCATGTAGTTGAG |

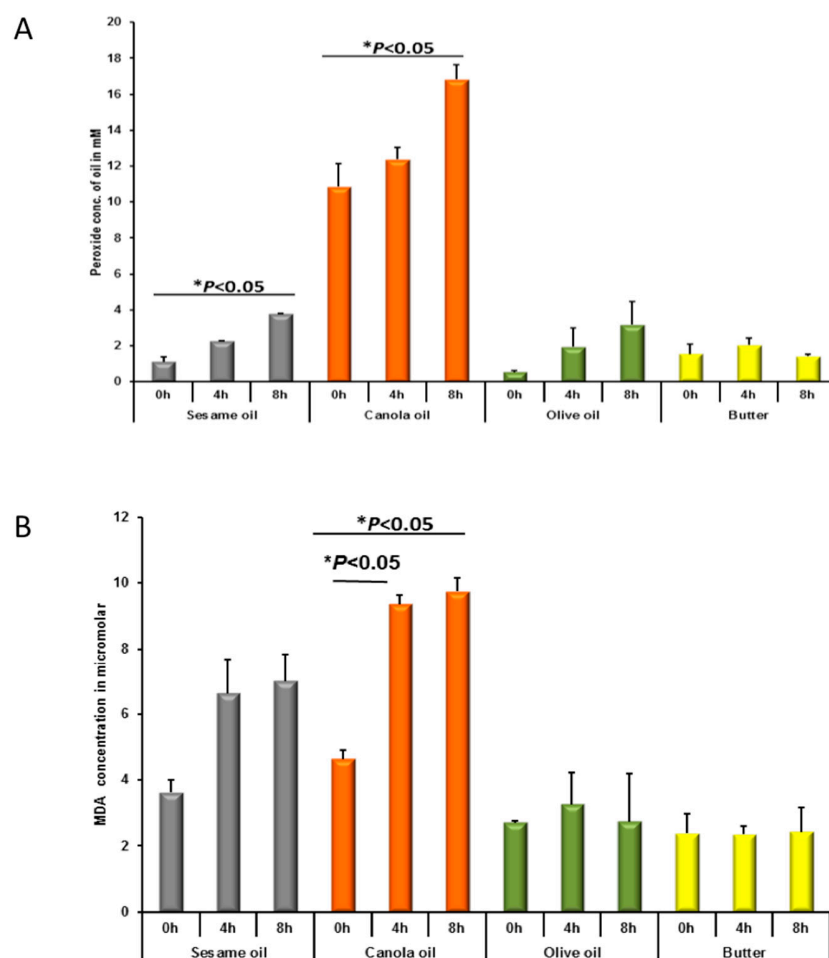

**Figure S1. Peroxide and MDA content in cooking oils and butter following heating.** Peroxide content (A) was determined by LMB assay ( $n = 3/\text{oil}$ ) and MDA content (B) was determined by TBARS ( $n = 3/\text{oil}$ ). Peroxide content increased significantly during the 8hr cooking period, in both canola and sesame oil ( $p < 0.05$ ). MDA content also increased significantly during the cooking period in canola oil ( $p < 0.05$ ).

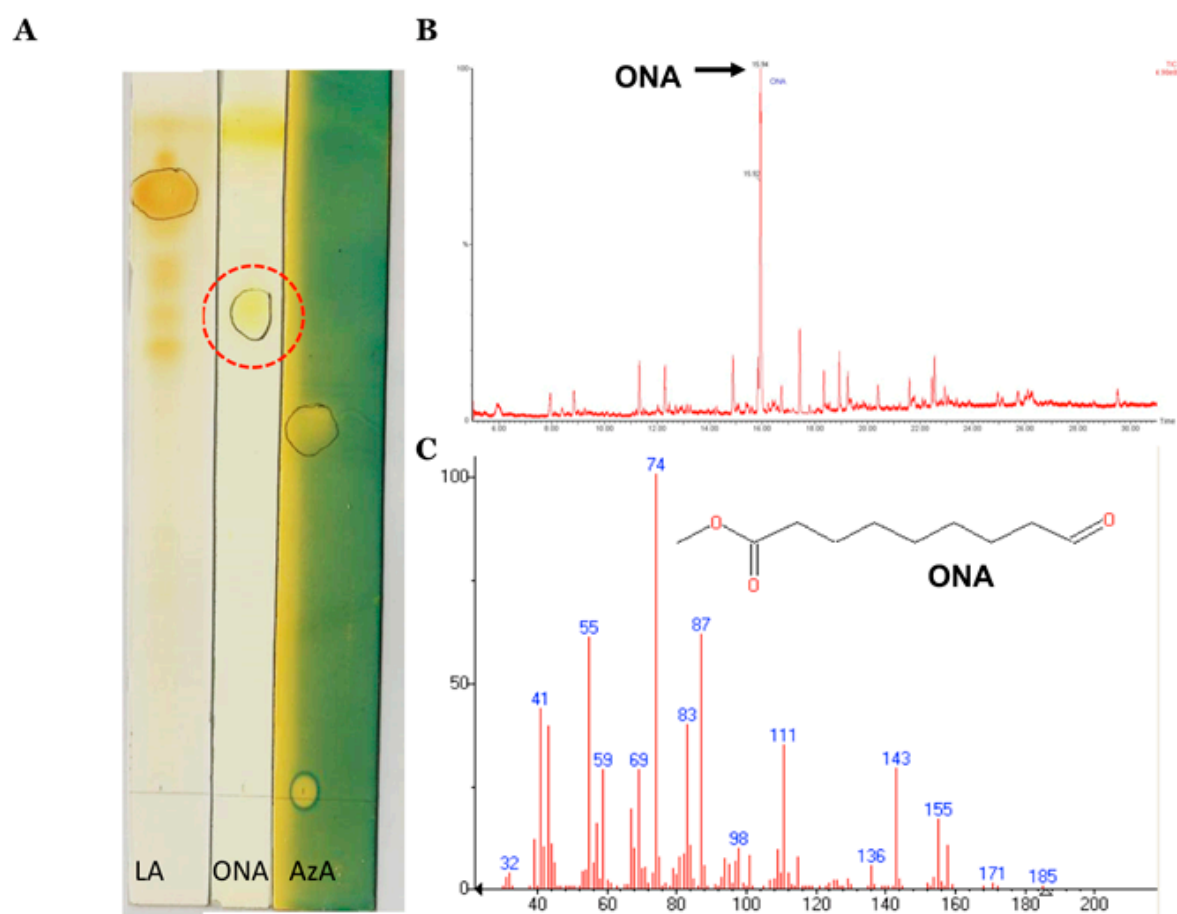

**Figure S2. Characterization of 9-ONA synthesized in the laboratory.** (A) TLC of 9-ONA (dashed circle) in solvent system of chloroform, tetrahydrofuran, and acetic acid (90:10:0.5). (B) Gas chromatogram of synthesized 9-ONA (RT of 15.94min). (C) Mass spectrum of 9-ONA.

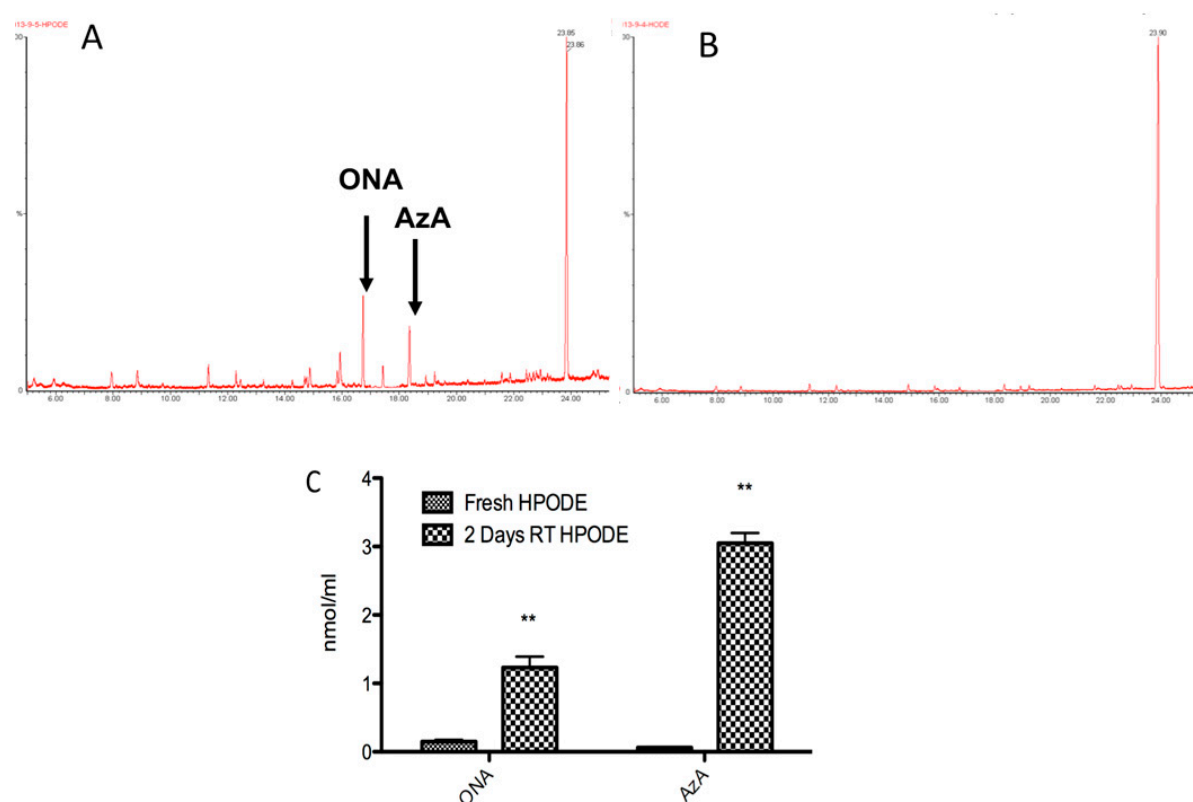

**Figure S3. Decomposition products of 13-HPODE at room temperature for 0hr and 48hr.** (A) Representative gas chromatogram of 13-HPODE at room temperature (RT) for 48hrs. (B) Representative gas chromatogram of freshly prepared 13-HPODE, and (C) GC-MS quantification of 9-ONA and AzA from samples of freshly prepared 13-HPODE and 13-HPODE incubated for 48hrs at room temperature ( $n = 9/\text{group}$ ; \*\* $p < 0.01$ ).

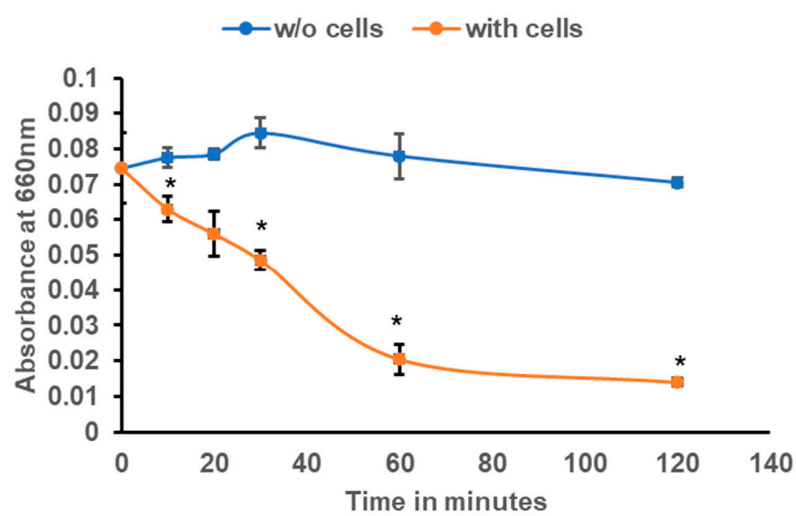

Figure S4. Decomposition of 13-HPODE in the presence or absence of fully differentiated Caco-2 cells by LMB assay.

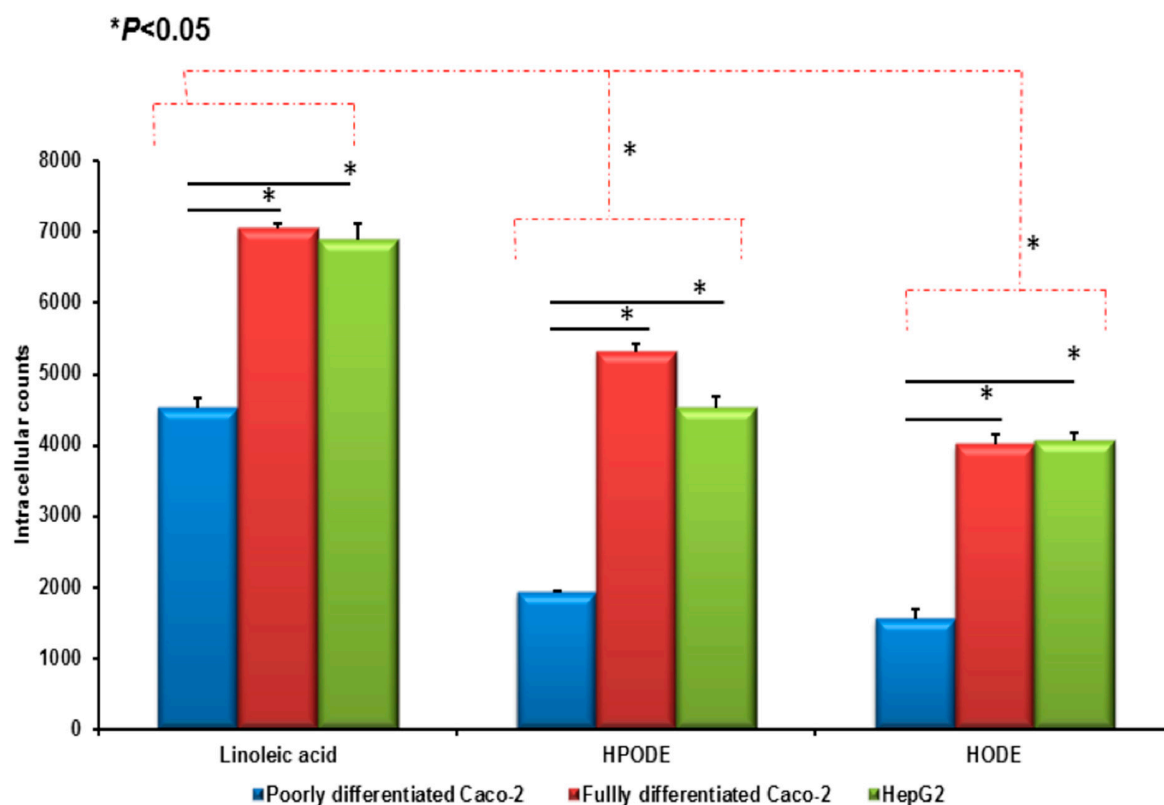

Figure S5. Cellular uptake of linoleic acid and oxidized decomposition products. Uptake of  $^{14}\text{C}$ -labeled LA, 13-HPODE, and 13-HODE by poorly differentiated Caco-2, fully differentiated Caco-2 and HepG2 cells was determined and adjusted to cellular protein concentration ( $n = 9/\text{group}$ ;  $p < 0.05$ ).

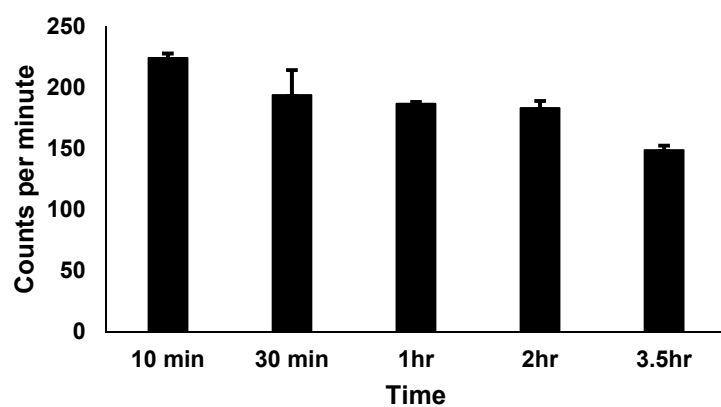

Figure S6. Quantification for <sup>14</sup>C-13-HPODE TLC counts over 3.5hrs.

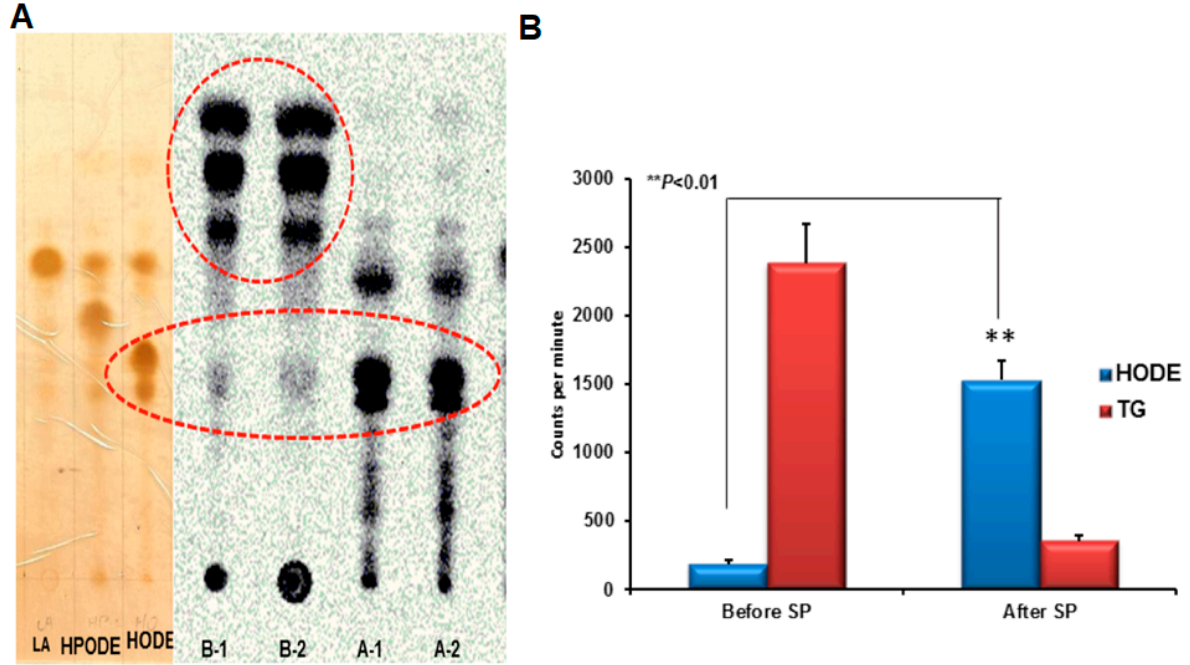

**Figure S7. Representative TLC radioautograph of  $^{14}\text{C}$ -13-HPODE and decomposition products from fully differentiated Caco-2 cells before and after saponification (SP). Panel (A): Intracellular lipid fractions before (B-1 and B-2 spots) and after (A-1 and A-2 spots) saponification (1 and 2 represent different samples). Panel (B): Quantification of radioactive counts of 13-HODE and triacylglycerol (TG) fractions on TLC plate ( $n = 9/\text{group}$ ;  $**p < 0.01$ ).**



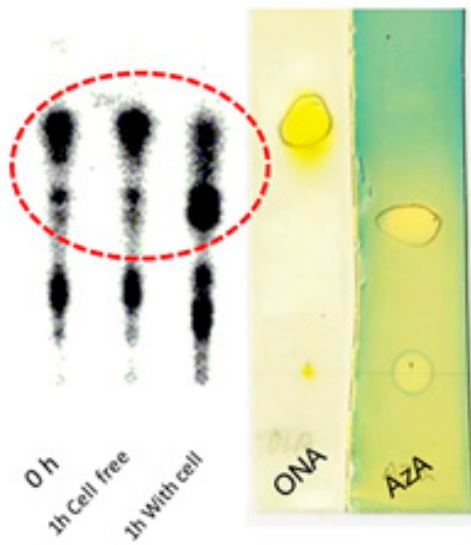

Figure S8. Representative TLC radioautography of media following  $^{14}\text{C}$ -9-ONA treatment of fully differentiated Caco-2 cells or cell-free media for 1hr.

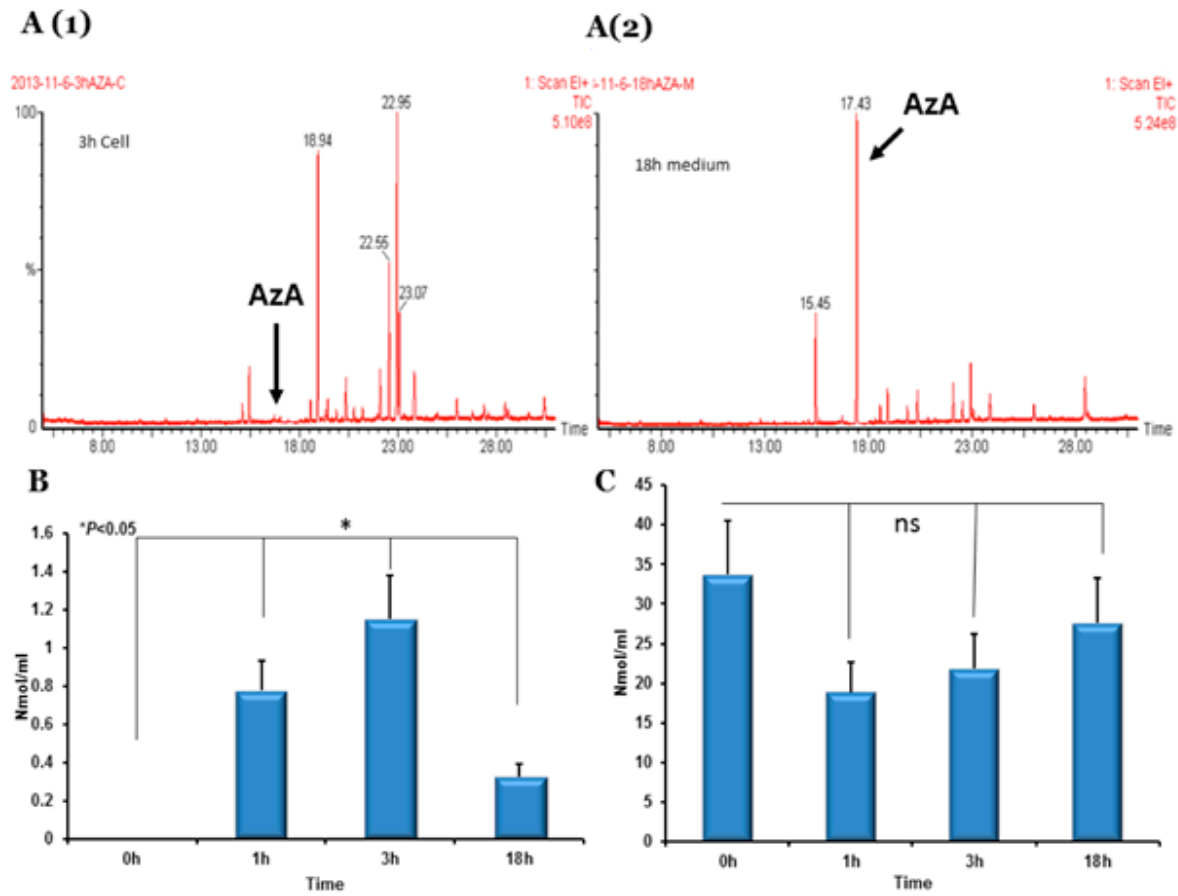

**Figure S9. AzA remains detectable in fully differentiated Caco-2 cell culture media.** (A1-2) Representative gas chromatograms of lipid extract from AzA-treated Caco-2 cell lysate and media, respectively. (B) Quantification of intracellular AzA over 18hrs following saponification ( $n = 3$ ;  $*p < 0.05$ ). (C) Quantification of cell media AzA over 18hrs ( $n = 3$ ). Data pooled from 3 independent experiments.

A

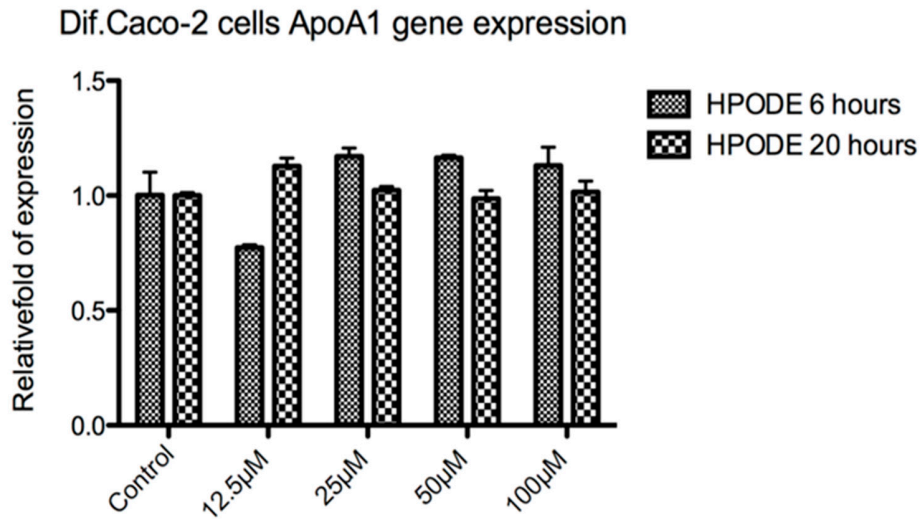

B

Poorly dif. Caco-2 cells ApoA1 gene expression

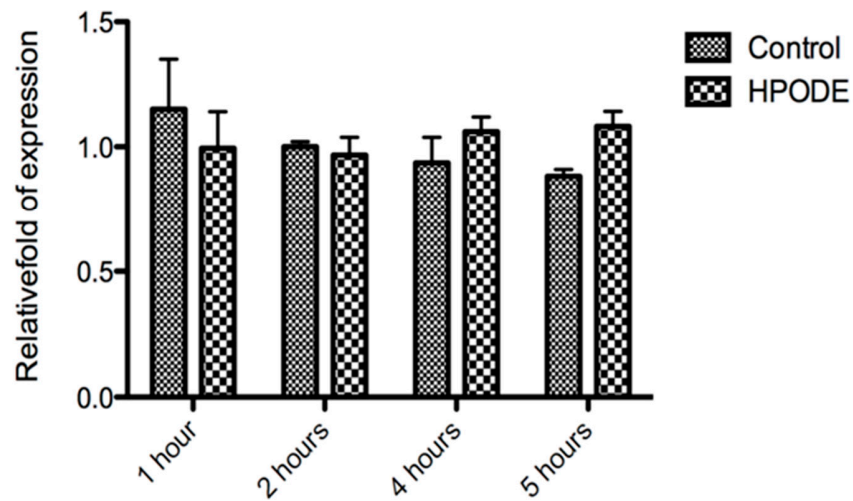

**Figure S10. Normalized gene expression of ApoA1 in Caco-2 cells following 13-HPODE treatment.** (A) Fully differentiated Caco-2 cells with 13-HPODE concentrations from 0-100 $\mu$ M and (B) poorly differentiated Caco-2 cells in comparison to control (no 13-HPODE) ( $n=6$ /treatment).

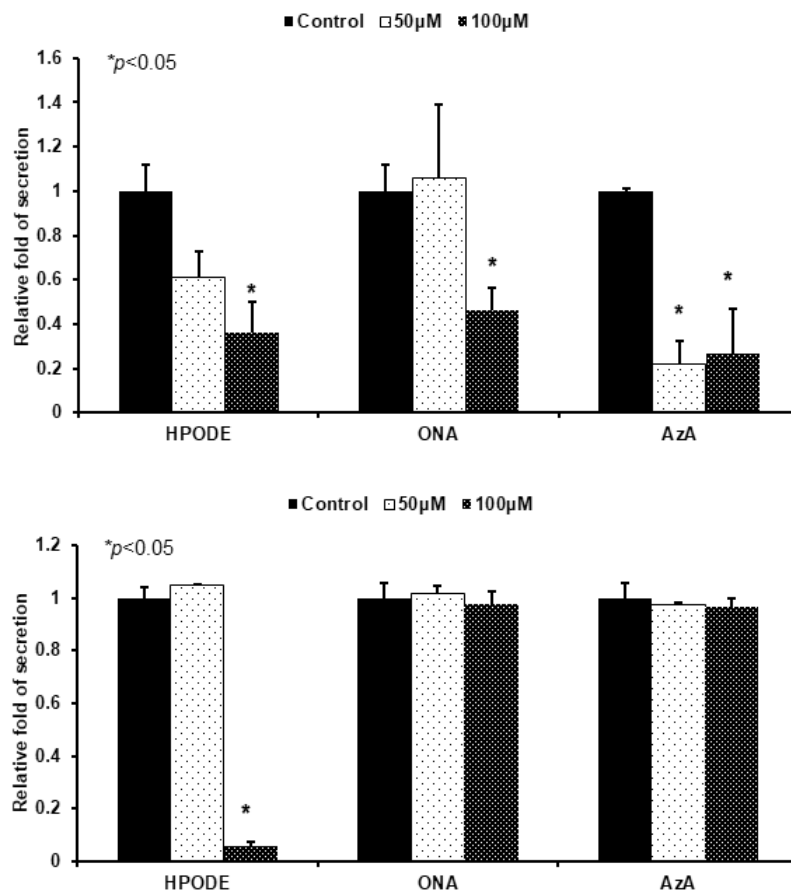

**Figure S11. ApoB secretion following 24hr 13-HPODE, 9-ONA, and AzA treatment. (A)** Fully differentiated Caco-2 cell media and **(B)** HepG2 cell media ( $n \geq 9$ /group,  $*p < 0.05$ ).
